# Supplementary material for: An Integrated Tool to Study MHC Region: Accurate SNV Detection and HLA Genes Typing in Human MHC Region Using Targeted High-Throughput Sequencing
Source: PLoS One. 2013 Jul 24;8(7):e69388. doi: 10.1371/journal.pone.0069388 (PMC3722289; doi:10.1371/journal.pone.0069388)
Supplement: Table S2 — Distribution of variations within different genomics functional regions for three samples. (XLSX) [file pone.0069388.s002.xlsx]

## Sheet: Table S2
Table S2. Distribution of variations within different genomics functional regions for three samples
Categories	YH (percentage)	NA18532 (percentage)	NA18555 (percentage)
Synonymous-exonic	174 (0.816)	202 (0.958)	205 (0.910)
Nonsynonymous-exonic	219 (1.027)	257 (1.219)	266 (1.180)
Stopgain-exonic	1 (0.005)	3 (0.014)	3 (0.013)
Stoploss-exonic	1 (0.005)	1 (0.005)	1 (0.004)
Frameshift-exonic	13 (0.061)	6 (0.028)	7 (0.031)
Splicing	2 (0.009)	3 (0.014)	1 (0.004)
UTR5	72 (0.337)	70 (0.332)	74 (0.328)
UTR3	332 (1.556)	338 (1.603)	342 (1.518)
Intronic	3479 (16.307)	3255 (15.438)	3513 (15.589)
Downstream	626 (2.934)	451 (2.139)	507 (2.250)
Upstream; Downstream	565 (2.648)	437 (2.073)	532 (2.361)
Intergenic	14533 (68.121)	15041 (71.338)	16187 (71.830)
NcRNA	1317 (6.173)	1020 (4.838)	897 (3.980)
Total	21334 (100)	21084 (100)	22535 (100)
